# Supplementary material for: DL-PPI: a method on prediction of sequenced protein–protein interaction based on deep learning
Source: PubMed Central journal article supplement (PMC10722729; doi:10.1186/s12859-023-05594-5), 2023-12-14
Supplement: 12859_2023_5594_MOESM1_ESM.pdf [file 12859_2023_5594_MOESM1_ESM.pdf]

# Appendix A Comparison of Precision and Recall

**Table A1** Precision of DL-PPI and comparative methods on three datasets.

| Dataset | Partition Scheme | Precision(%) |        |       |         |        |
|---------|------------------|--------------|--------|-------|---------|--------|
|         |                  | DNN-PPI      | TAGPPI | PIPR  | GNN-PPI | DL-PPI |
| SHS27k  | Random           | 70.45        | 86.33  | 79.92 | 90.08   | 90.71  |
|         | BFS              | 68.92        | 68.16  | 39.7  | 70.78   | 70.41  |
|         | DFS              | 68.99        | 69.81  | 68.56 | 72.27   | 79.3   |
| SHS148k | Random           | 88.91        | 89.85  | 91.86 | 91.15   | 92.9   |
|         | BFS              | 67.42        | 67.98  | 72.49 | 70.78   | 70.39  |
|         | DFS              | 76.77        | 70.69  | 71.94 | 87.23   | 86.75  |
| STRING  | Random           | 84.97        | 90.05  | 92.79 | 94.42   | 95.28  |
|         | BFS              | 61.28        | 71.06  | 75.69 | 77.53   | 78.88  |
|         | DFS              | 67.16        | 77.82  | 69.81 | 91.02   | 93.47  |

**Table A2** Recall of DL-PPI and comparative methods on three datasets.

| Dataset | Partition Scheme | Recall(%) |        |       |         |        |
|---------|------------------|-----------|--------|-------|---------|--------|
|         |                  | DNN-PPI   | TAGPPI | PIPR  | GNN-PPI | DL-PPI |
| SHS27k  | Random           | 75.46     | 84.85  | 89.46 | 84.3    | 88.45  |
|         | BFS              | 39.57     | 39.44  | 55.39 | 63.94   | 72.17  |
|         | DFS              | 52.57     | 62.37  | 45.34 | 72.87   | 73.45  |
| SHS148k | Random           | 85.45     | 88.72  | 90.07 | 89.16   | 92.15  |
|         | BFS              | 48.81     | 55.23  | 52.57 | 63.94   | 68.68  |
|         | DFS              | 48.36     | 65.85  | 56.4  | 81.88   | 85.49  |
| STRING  | Random           | 79.3      | 87.99  | 91.13 | 92.86   | 94.22  |
|         | BFS              | 51.49     | 50.5   | 45.86 | 75.5    | 75.31  |
|         | DFS              | 53.3      | 60.78  | 62.37 | 89.31   | 91.99  |
